# Supplementary material
Source: Springer Nature journal article supplement (https://www.springermedizin.de/resource/supplementary/12889_2006_626_MOESM1_ESM.pdf/9501710)
Supplement: MOESM1 [file 9501710]

Assessed for eligibility ( $n = 505$ )

Ineligible ( $n = 111$ )\*

Eligible ( $n = 319$ )

Not consented ( $n = 114$ )

Consented ( $n = 205$ )

*Reasons why families did not consent: lack of time, not able to make baseline assessment, no child-minding for other siblings, wanted something different, not able to commit for the whole program*

Randomised ( $n = 205$ )

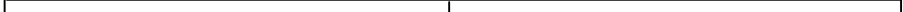

DM  
( $n = 65$ )

PASD  
( $n = 74$ )

DM + PASD  
( $n = 66$ )
